# Supplementary material for: Lipocalin-2 (Lcn-2) Attenuates Polymicrobial Sepsis with LPS Preconditioning (LPS Tolerance) in FcGRIIb Deficient Lupus Mice
Source: PubMed Central journal article supplement (PMC6769833; doi:10.3390/cells8091064), 2019-09-11
Supplement: cells-08-01064-s001.pdf [file cells-08-01064-s001.pdf]

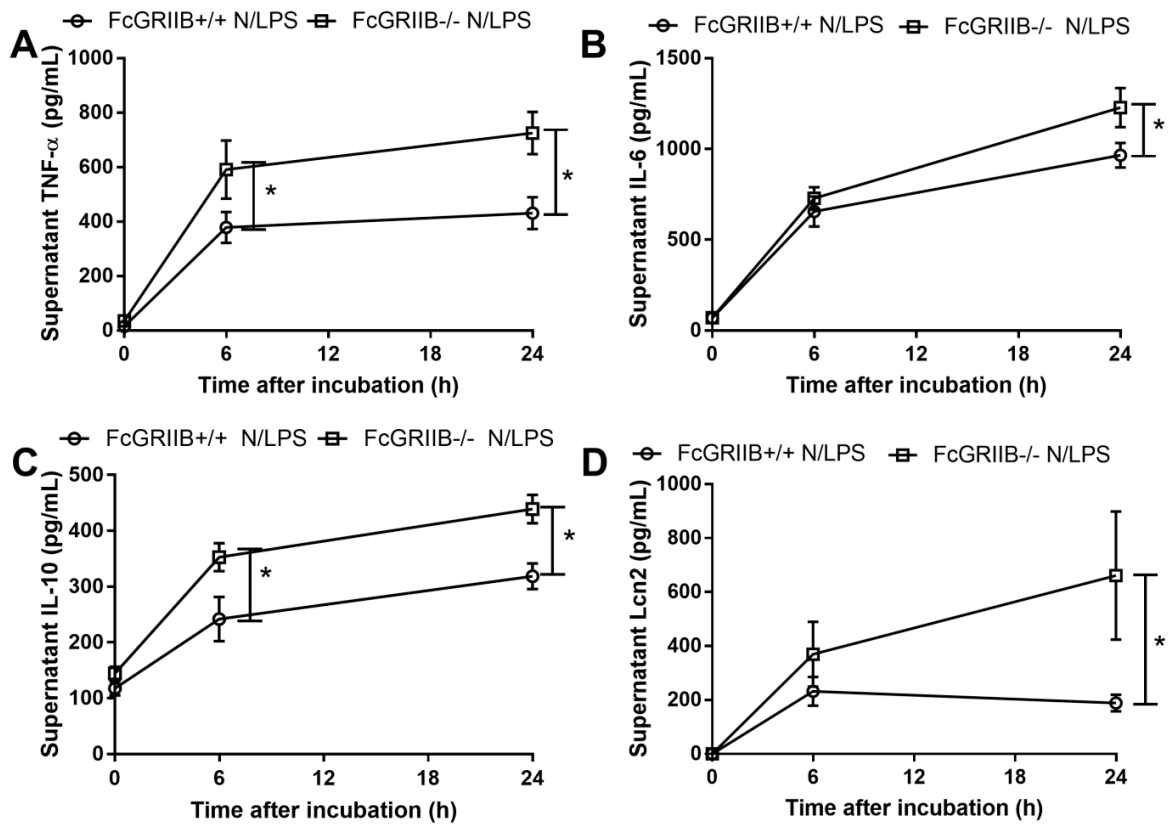

**Figure S1.** The characteristics of bone marrow derived macrophage from wild-type (FcGRIIB+/+) and FcGRIIB-/- mice with once LPS stimulation (N/LPS) as determined by supernatant cytokines (A-C) and Lipocalin-2 (Lcn-2) were demonstrated. (Independent triplicate experiments were performed for all experiments; \*,  $p < 0.05$ ).
